# Supplementary material for: Predictive value of the Status Epilepticus Severity Score (STESS) and its components for long-term survival
Source: Springer Nature journal article supplement (doi:10.1186/s12883-016-0730-0), 2016-11-05

# Supplementary Figure 1

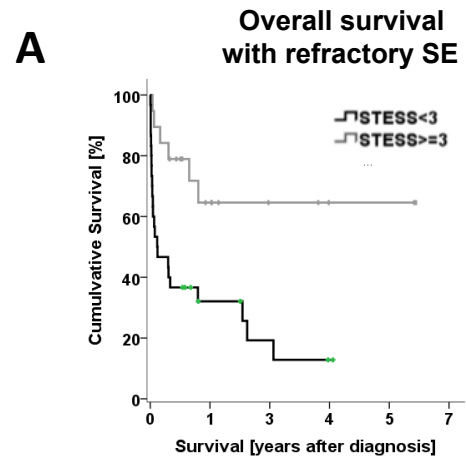

Supplement: MOESM2 [file 11022764]
